# Supplementary material for: New two-dimensional flat band materials: B3C11O6 and B3C15O6
Source: Royal Society of Chemistry journal article supplement (doi:10.1039/d3cp04002j), 2023-01-01
Supplement: d3cp04002j2.pdf [file d3cp04002j2.pdf]

supplemental material for

## New two-dimensional flat band materials: $B_3C_{11}O_6$ and $B_3C_{15}O_6$

Jialuo Dong,<sup>1</sup> Pan Zhou,<sup>1,\*</sup> Yuzhong Hu,<sup>1</sup> and Lizhong Sun<sup>1,†</sup>

<sup>1</sup>Hunan Provincial Key laboratory of Thin Film Materials and Devices,  
School of Material Sciences and Engineering, Xiangtan University, Xiangtan 411105, China

(Dated: September 25, 2023)

### I. STRUCTURAL EVOLUTION FROM KAGOME TO KAGOME-1 AND KAGOME-2

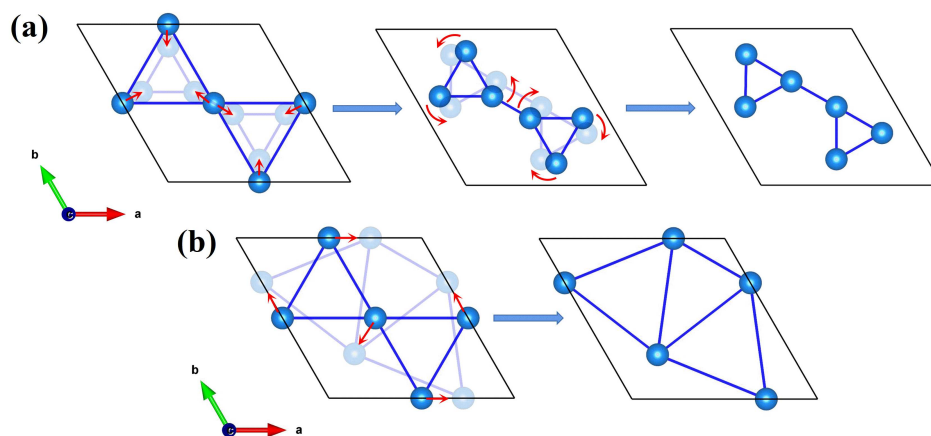

Figure S1: Structural evolution from kagome to (a) kagome-1 and (b) kagome-2.

## II. KAGOME-1 AND DISTORTED KAGOME-1 AND CORRESPONDING ENERGY BAND STRUCTURE

Figures S2(a) and S2(b), respectively, are the crystal structures of kagome-1 and distorted kagome-1. Their energy band structures with the parameters of  $t_1 = -1.0$  and  $t_2 = -1.0$  are shown in Fig. S2(c) and S2(d). It is revealed that their energy bands share the similar characteristic of dispersion.

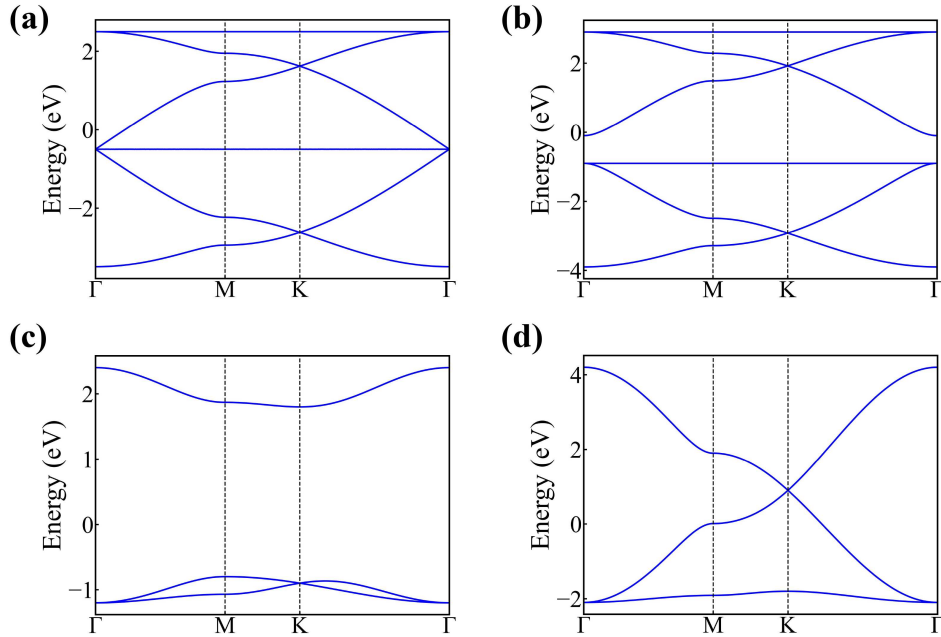

Figure S2: (a) and (b) are two structures of kagome-1 respectively, where  $t_1 = -1.0$  and  $t_2 = -1.0$ . (c) and (d) correspond to their energy bands respectively.

We can obtain three typical energy band dispersions in the kagome-1 lattice by adjusting the parameters  $t_1$  and  $t_2$ . The band structure is shown in Fig. 1(e) of the main text when  $t_2 < \frac{3t_1}{2}$ . Here, we present the band structure at  $t_2 = \frac{3t_1}{2}$  and  $t_2 > \frac{3t_1}{2}$  in Fig. S3(a) and S3(b), respectively. We provide the band structure for kagome-2 lattice that only takes into account  $t_1$  and  $t_2$ . The band structure is presented as two crossed bands and one isolated band with apparent dispersion when  $t_1 > t_2$  [see Fig. S3(c)]. However, since the focus of our research is on the flat band's physical characteristics, adding the third nearest neighbor results in a flat band with virtually no bandwidth [see Fig. 1(f) of the main text]. Additionally, the band structure of the kagome-2 lattice is nearly identical to that of the Kagome lattice when we make  $t_2 \gg t_1$ , as shown in Fig. S3(d).

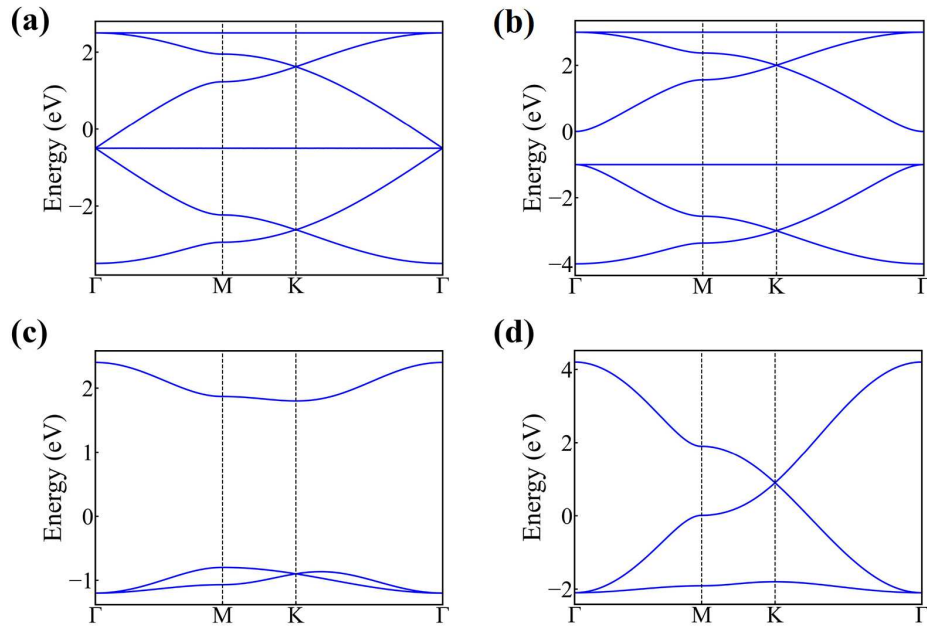

Figure S3: The energy band structure of kagome-1 lattice with (a)  $t_1 = -1.0$  and  $t_2 = -1.5$ , and (b)  $t_1 = -1.0$  and  $t_2 = -2.0$ . The energy band structure of kagome-2 lattice with (c)  $t_1 = 1.0$  and  $t_2 = 0.1$ , and (d)  $t_1 = -0.1$  and  $t_2 = -1.0$ .

---

\* Electronic address: zhoupan71234@xtu.edu.cn

† Electronic address: lzsun@xtu.edu.cn
